# Supplementary material for: The impact of the cation alkyl chain length on the wettability of alkylimidazolium-based ionic liquids at the nanoscale
Source: Royal Society of Chemistry journal article supplement (doi:10.1039/d2cp01868c), 2022-01-01
Supplement: d2cp01868c1.pdf [file d2cp01868c1.pdf]

## **Supporting Information**

### ***The impact of the cation alkyl chain length on the wettability of alkyimidazolium-based ionic liquids at the nanoscale***

José C. S. Costa,\* Alexandre Alves, Margarida Bastos, Luís M. N. B. F. Santos

*CIQUP, Institute of Molecular Sciences (IMS), Department of Chemistry and Biochemistry, Faculty of Science, University of Porto, Rua do Campo Alegre, P4169 007 Porto, Portugal*

\*E-mail: [jose.costa@fc.up.pt](mailto:jose.costa@fc.up.pt)

## Index

|                                                                                                                                                                                                                                   |            |
|-----------------------------------------------------------------------------------------------------------------------------------------------------------------------------------------------------------------------------------|------------|
| <b>Fig. S1.</b> Schematic representation of the physical vapor deposition methodology.                                                                                                                                            | <b>S3</b>  |
| <b>Fig. S2.</b> Schematic representation of the ovens and image of an individual oven.                                                                                                                                            | <b>S3</b>  |
| <b>Fig. S3.</b> Schematic representation and images of the substrate support system.                                                                                                                                              | <b>S4</b>  |
| <b>Fig. S4.</b> Mechanisms of nucleation and growth of ionic liquid films.                                                                                                                                                        | <b>S4</b>  |
| <b>Fig. S5.</b> Morphology of the substrates (ITO, Ag, and Au).                                                                                                                                                                   | <b>S5</b>  |
| <b>Fig. S6.</b> Morphology of vapor-deposited ionic liquids onto ITO surfaces and the respective droplet size distribution.                                                                                                       | <b>S6</b>  |
| <b>Fig. S7.</b> Morphology of vapor-deposited ionic liquids onto Ag/ITO surfaces and the respective droplet size distribution.                                                                                                    | <b>S7</b>  |
| <b>Fig. S8.</b> Morphology of vapor-deposited ionic liquids onto Au/ITO surfaces and the respective droplet size distribution.                                                                                                    | <b>S8</b>  |
| <b>Fig. S9.</b> Detailed morphology of vapor-deposited ionic liquids onto Au/ITO/glass surfaces.                                                                                                                                  | <b>S9</b>  |
| <b>Fig. S10.</b> Morphology of vapor-deposited [C <sub>8</sub> C <sub>1</sub> im][NTf <sub>2</sub> ] onto Au/ITO/glass surfaces: as-deposited samples and samples exposed to 100°C, 150°C, and 200°C.                             | <b>S10</b> |
| <b>Fig. S11.</b> Three-dimensional AFM image for vapor-deposited [C <sub>1</sub> C <sub>1</sub> im][NTf <sub>2</sub> ] onto the ITO/glass surface. The geometric parameters of the droplets marked in the AFM image are depicted. | <b>S11</b> |
| <b>Fig. S12.</b> Three-dimensional AFM image for vapor-deposited [C <sub>2</sub> C <sub>2</sub> im][NTf <sub>2</sub> ] onto the ITO/glass surface. The geometric parameters of the droplets marked in the AFM image are depicted. | <b>S12</b> |
| <b>Fig. S13.</b> Three-dimensional AFM image for vapor-deposited [C <sub>1</sub> C <sub>1</sub> im][NTf <sub>2</sub> ] onto the Ag/ITO surface. The geometric parameters of the droplets marked in the AFM image are depicted.    | <b>S13</b> |
| <b>Fig. S14.</b> Three-dimensional AFM image for vapor-deposited [C <sub>2</sub> C <sub>2</sub> im][NTf <sub>2</sub> ] onto the Ag/ITO surface. The geometric parameters of the droplets marked in the AFM image are depicted.    | <b>S14</b> |
| <b>Fig. S15.</b> Three-dimensional AFM image for vapor-deposited [C <sub>5</sub> C <sub>5</sub> im][NTf <sub>2</sub> ] onto the Ag/ITO surface. The geometric parameters of the droplets marked in the AFM image are depicted.    | <b>S15</b> |
| <b>Fig. S16.</b> Three-dimensional AFM image for vapor-deposited [C <sub>8</sub> C <sub>1</sub> im][NTf <sub>2</sub> ] onto the Ag/ITO surface. The geometric parameters of the droplets marked in the AFM image are depicted.    | <b>S16</b> |
| <b>Table S1.</b> Diameter, height, and predicted contact angles for vapor-deposited micro- and nanodroplets of ionic liquids.                                                                                                     | <b>S17</b> |
| <b>Table S2.</b> Experimental conditions for the physical vapor deposition of various ionic liquids.                                                                                                                              | <b>S18</b> |

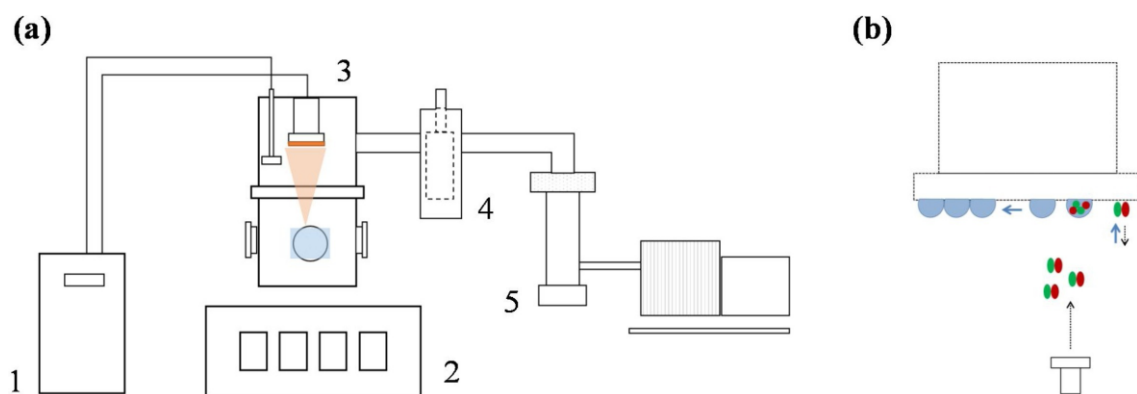

**Fig. S1.** Schematic representation of the physical vapor deposition methodology: (a) ThinFilmVD apparatus (1 – cooling system, 2 – instrumentation box, 3 – vacuum chamber, 4 – N<sub>2</sub> (l) metallic trap, 5 – vacuum pumping system); (b) schematic detail of the PVD of ionic liquids. More details: *Appl. Surf. Sci.*, 2018, 428, 242 and *J. Chem. Eng. Data*, 2015, 60, 3776.

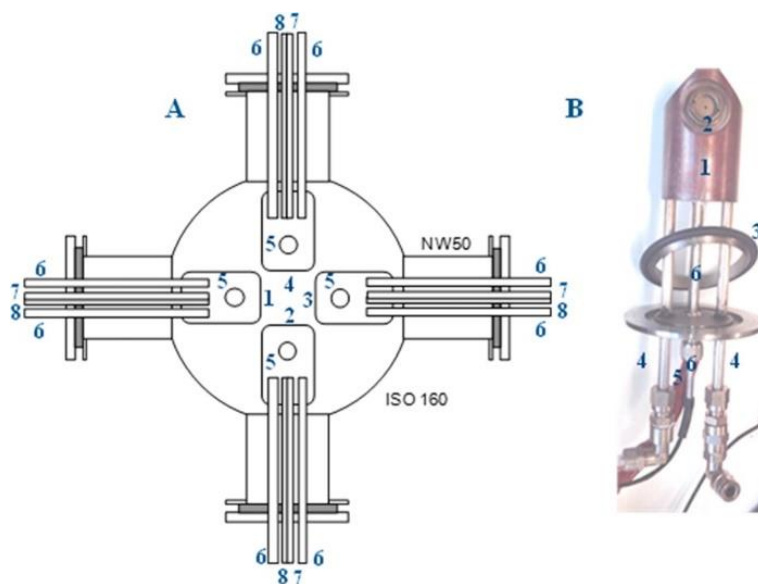

**Fig. S2.** A – Schematic representation of the ovens: 1, 2, 3, 4 – individual ovens; 5 – cavity of the Knudsen cell screwing; 6 – air cooling tube; 7 – heater; 8, – Pt100 sensor; B – Image of an individual oven (top view): 1 – copper block; 2 – Knudsen cell; 3 – Viton O-ring; 4 – cooling system; 5 – heater; 6 – Pt100. More details: *J. Chem. Eng. Data*, 2015, 60, 3776.

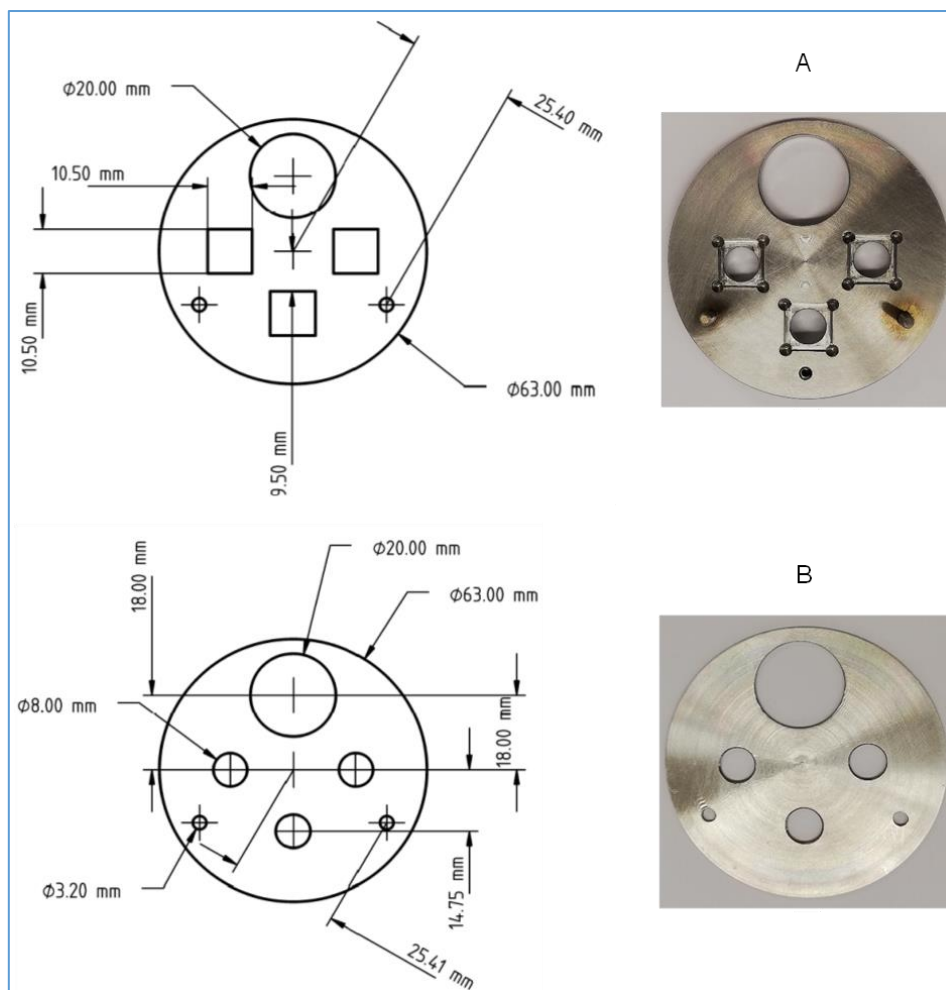

**Fig. S3.** A – Schematic representation (left) and images (right) of the substrate support system. The support was used for the simultaneous deposition of each IL on three different surfaces: ITO/glass; Ag/ITO/glass; Au/ITO/glass.

## PVD of Ionic Liquids

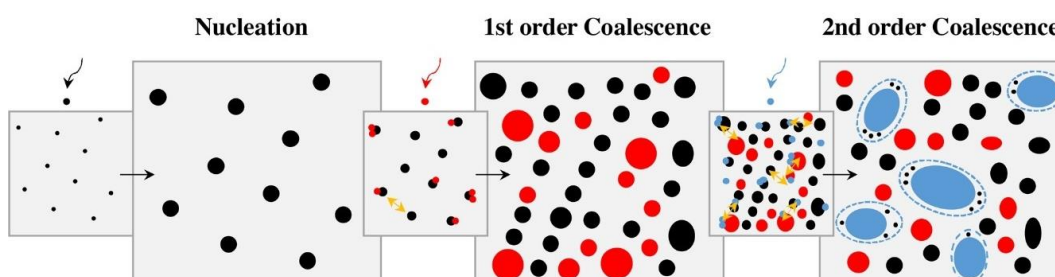

**Fig. S4.** Mechanisms of nucleation and growth of ionic liquid films: minimum free area to promote nucleation (MFAN); first-order coalescence; second-order coalescence. More details: *Appl. Surf. Sci.*, 2018, 428, 242.

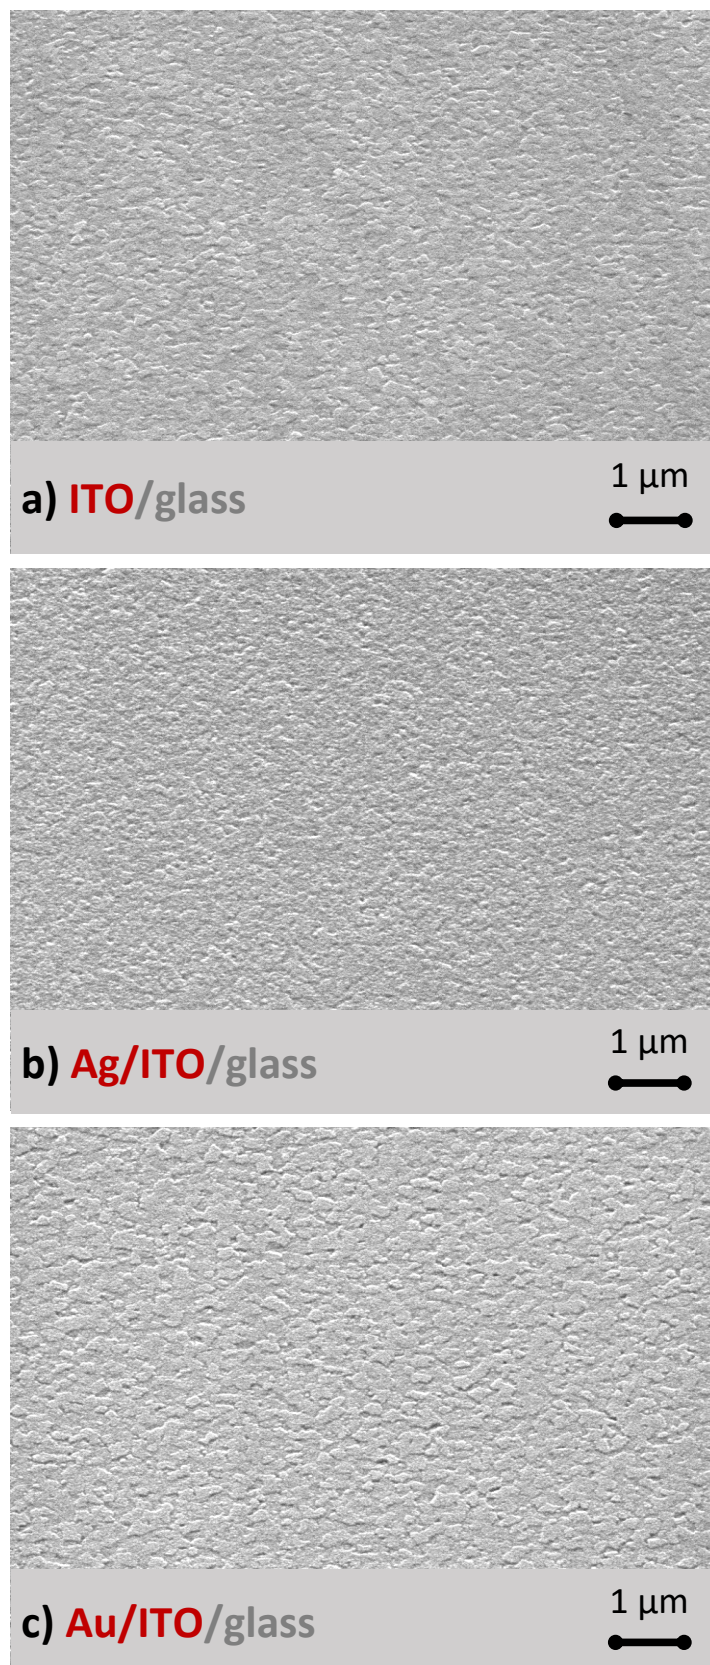

**Fig. S5.** Morphology of the substrates: indium tin oxide (ITO)/glass surface (a); silver(Ag)/ITO/glass surface (b); gold(Au)/ITO/glass surface. Micrographs were acquired through high-resolution scanning electron microscopy (SEM) by using a secondary electron detector (SED). Lateral views at 45° were obtained with a magnification of 25000×.

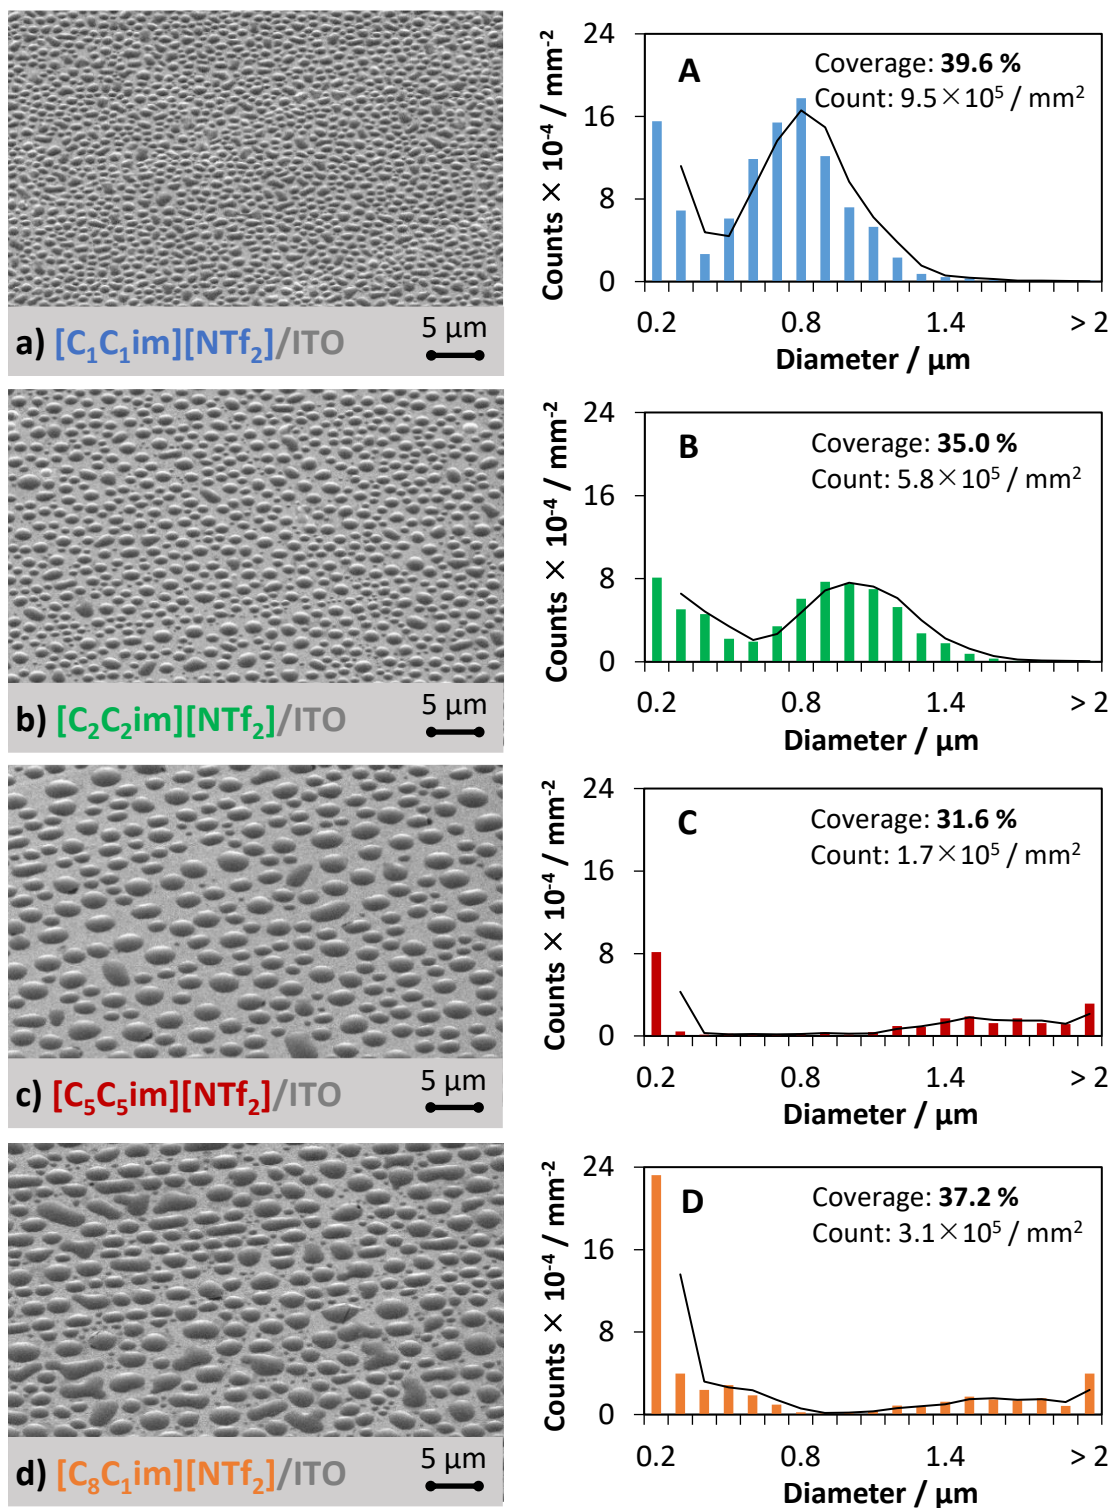

**Fig. S6.** Morphology of vapor-deposited ionic liquids (50 monolayers) onto indium tin oxide (ITO)/glass surfaces (a, b, c, d) and the respective droplet size distribution (A, B, C, D): [C<sub>1</sub>C<sub>1</sub>im][NTf<sub>2</sub>] (a, A), [C<sub>2</sub>C<sub>2</sub>im][NTf<sub>2</sub>] (b, B), [C<sub>5</sub>C<sub>5</sub>im][NTf<sub>2</sub>] (c, C), and [C<sub>8</sub>C<sub>1</sub>im][NTf<sub>2</sub>] (d, D). The ionic liquids were deposited under the same experimental procedure and setup. Micrographs were acquired through high-resolution scanning electron microscopy (SEM) by using a secondary electron detector (SED). Lateral views at 45° were obtained with a magnification of 5000×.

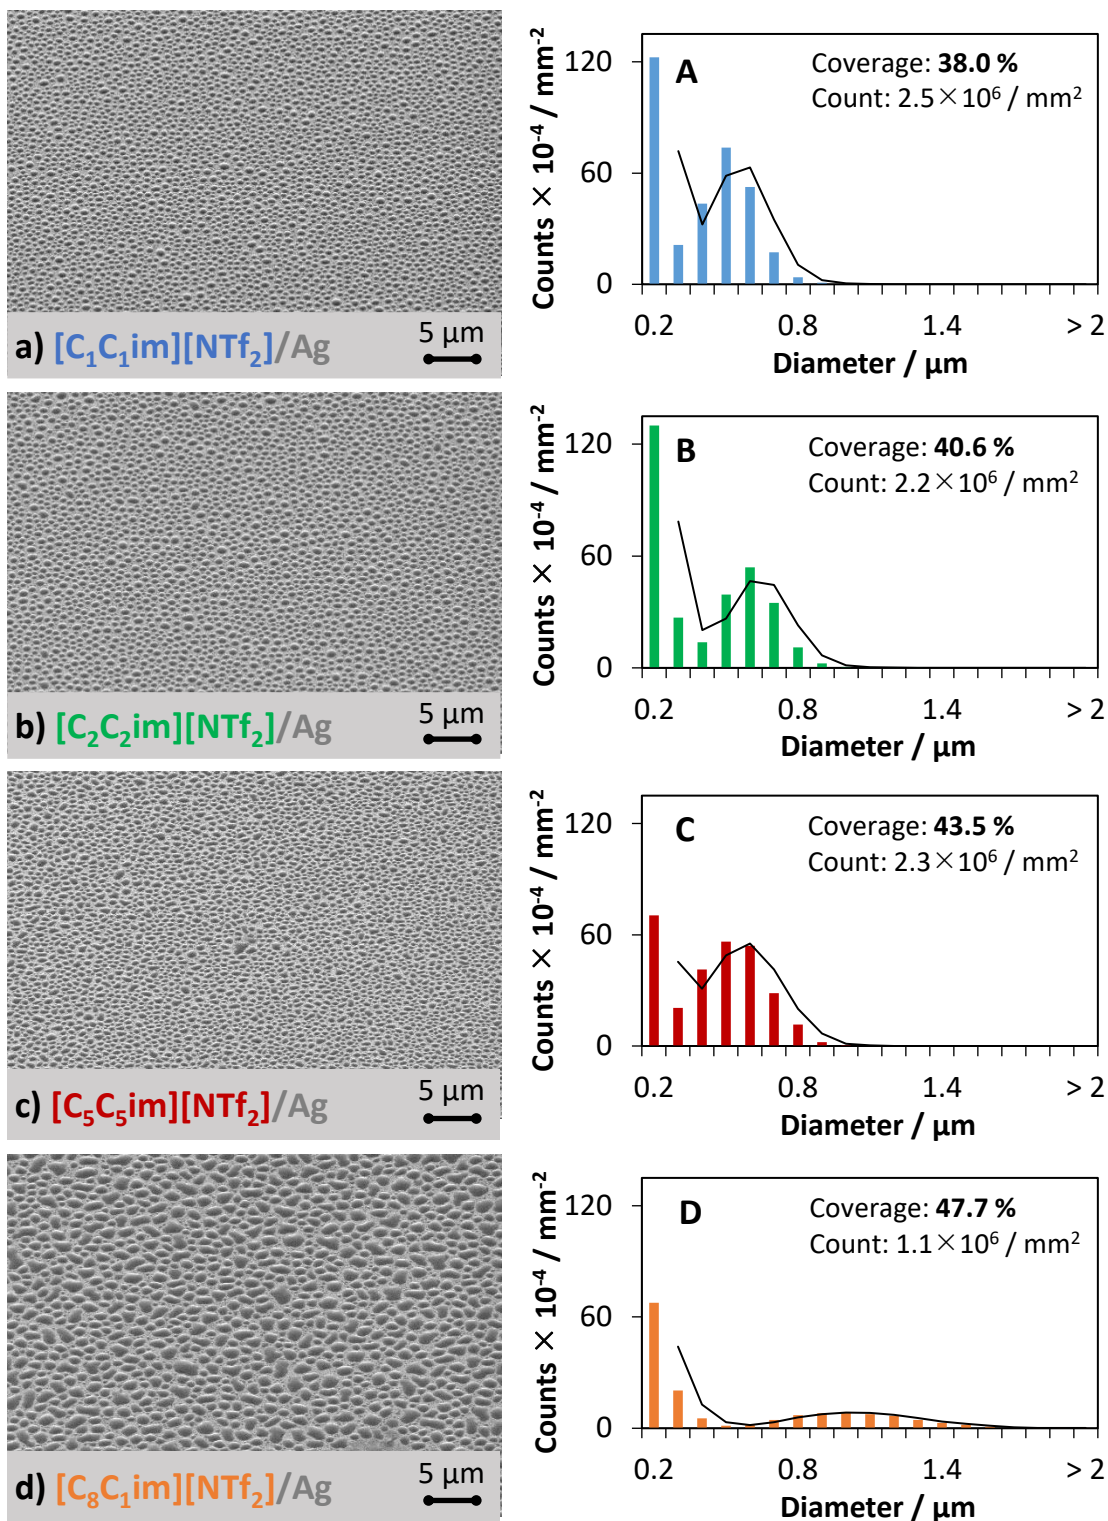

**Fig. S7.** Morphology of vapor-deposited ionic liquids (50 monolayers) onto silver(Ag)/ITO/glass surfaces (a, b, c, d) and the respective droplet size distribution (A, B, C, D): [C<sub>1</sub>C<sub>1</sub>im][NTf<sub>2</sub>] (a, A), [C<sub>2</sub>C<sub>2</sub>im][NTf<sub>2</sub>] (b, B), [C<sub>5</sub>C<sub>5</sub>im][NTf<sub>2</sub>] (c, C), and [C<sub>8</sub>C<sub>1</sub>im][NTf<sub>2</sub>] (d, D). The ionic liquids were deposited under the same experimental procedure and setup. Micrographs were acquired through high-resolution scanning electron microscopy (SEM) by using a secondary electron detector (SED). Lateral views at 45° were obtained with a magnification of 5000×.

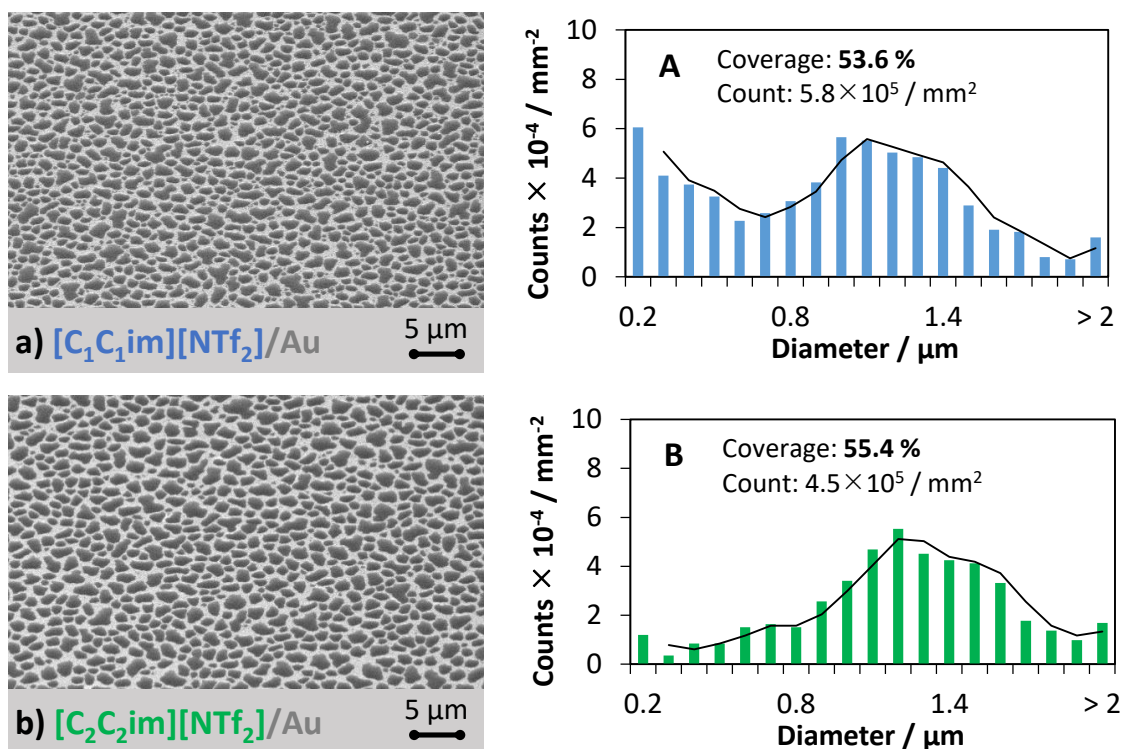

**Fig. S8.** Morphology of vapor-deposited ionic liquids (50 monolayers) onto gold(Au)/ITO/glass surfaces (a, b) and the respective droplet size distribution (A, B):  $[C_1C_1im][NTf_2]$  (a, A) and  $[C_2C_2im][NTf_2]$  (b, B). The ionic liquids were deposited under the same experimental procedure and setup. Micrographs were acquired through high-resolution scanning electron microscopy (SEM) by using a secondary electron detector (SED). Lateral views at  $45^\circ$  were obtained with a magnification of 5000 $\times$ .



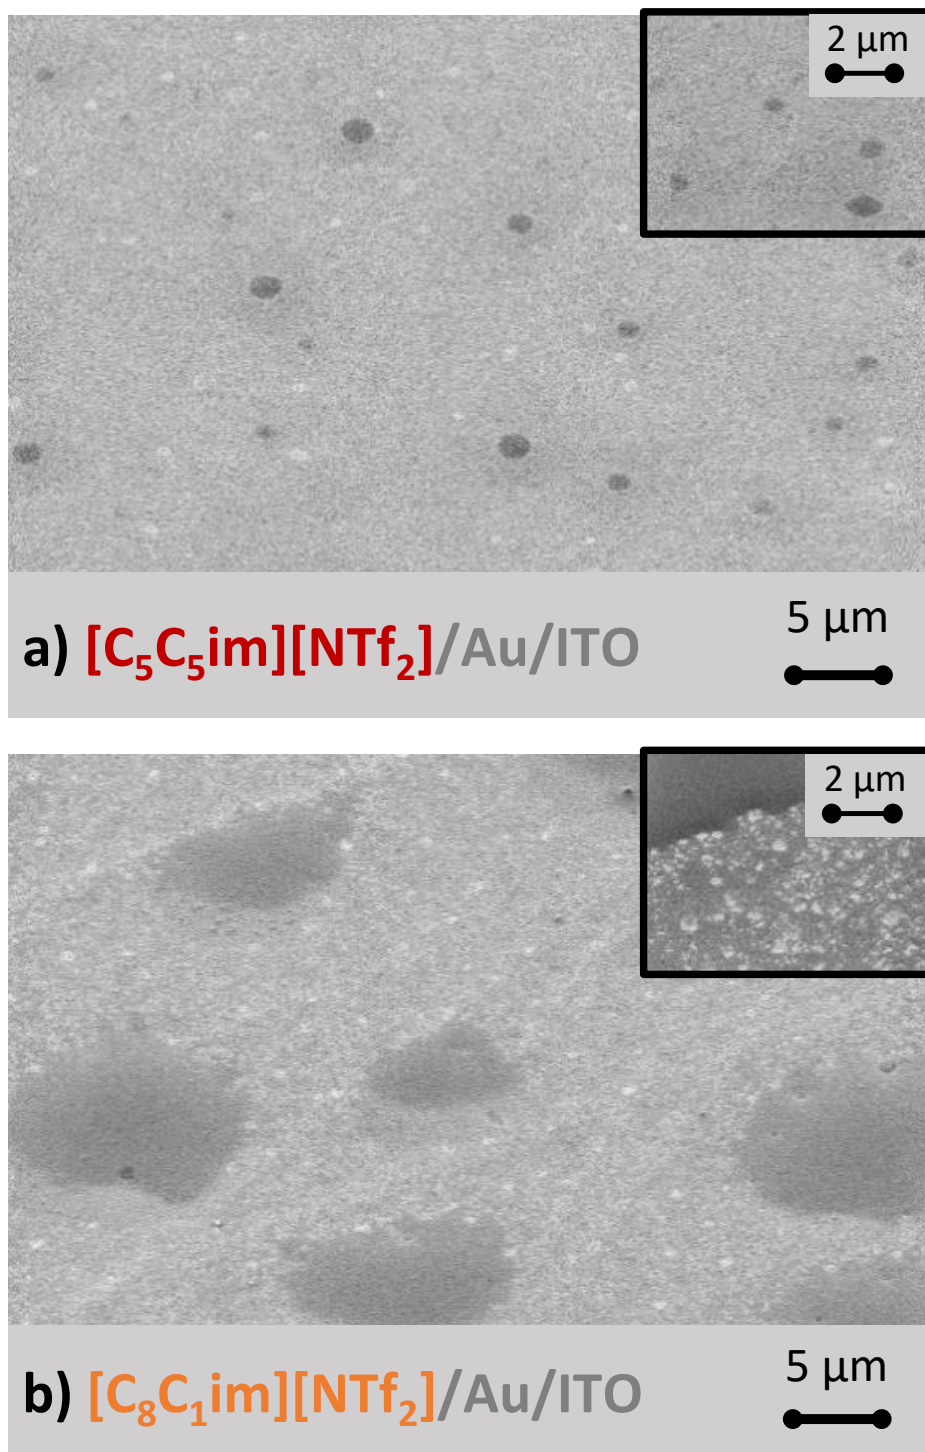

**Fig. S9.** Detailed Morphology of vapor-deposited ionic liquids (50 monolayers) onto gold(Au)/ITO/glass surfaces (a, b):  $[C_5C_5im][NTf_2]$  (a) and  $[C_8C_1im][NTf_2]$  (b). The ionic liquids were deposited under the same experimental procedure and setup. Micrographs were acquired through high-resolution scanning electron microscopy (SEM) by using a secondary electron detector (SED). Lateral views at  $45^\circ$  were obtained with a magnification of 5000 $\times$ .

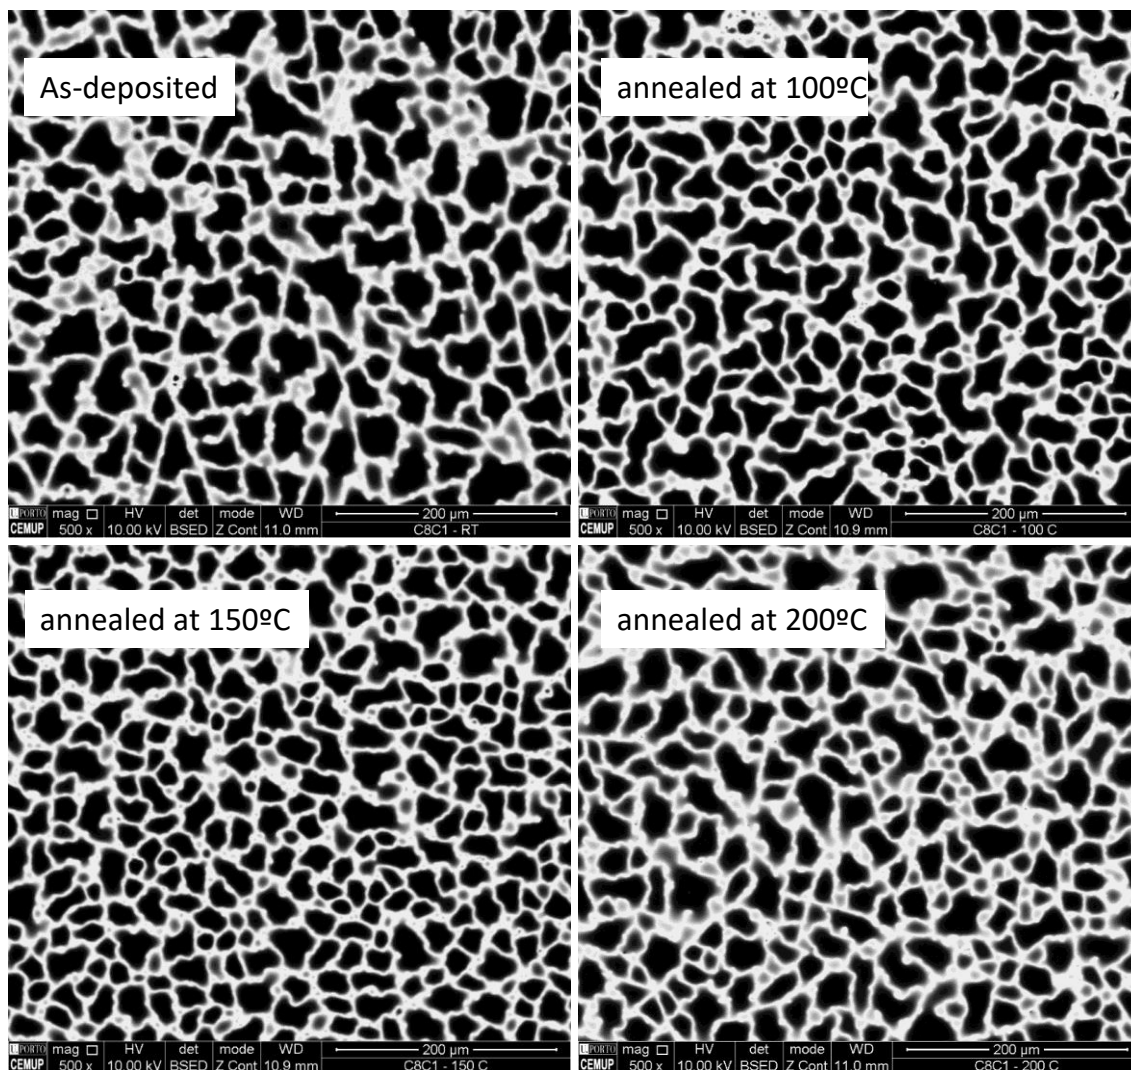

**Fig. S10.** Morphology of vapor-deposited [C<sub>8</sub>C<sub>1</sub>im][NTf<sub>2</sub>] (400 monolayers) onto gold(Au)/ITO/glass surfaces: as-deposited samples and samples exposed (annealed) to 100°C, 150°C, and 200°C. The impact of the air exposure and heat on the droplet morphology seems to be very reduced.

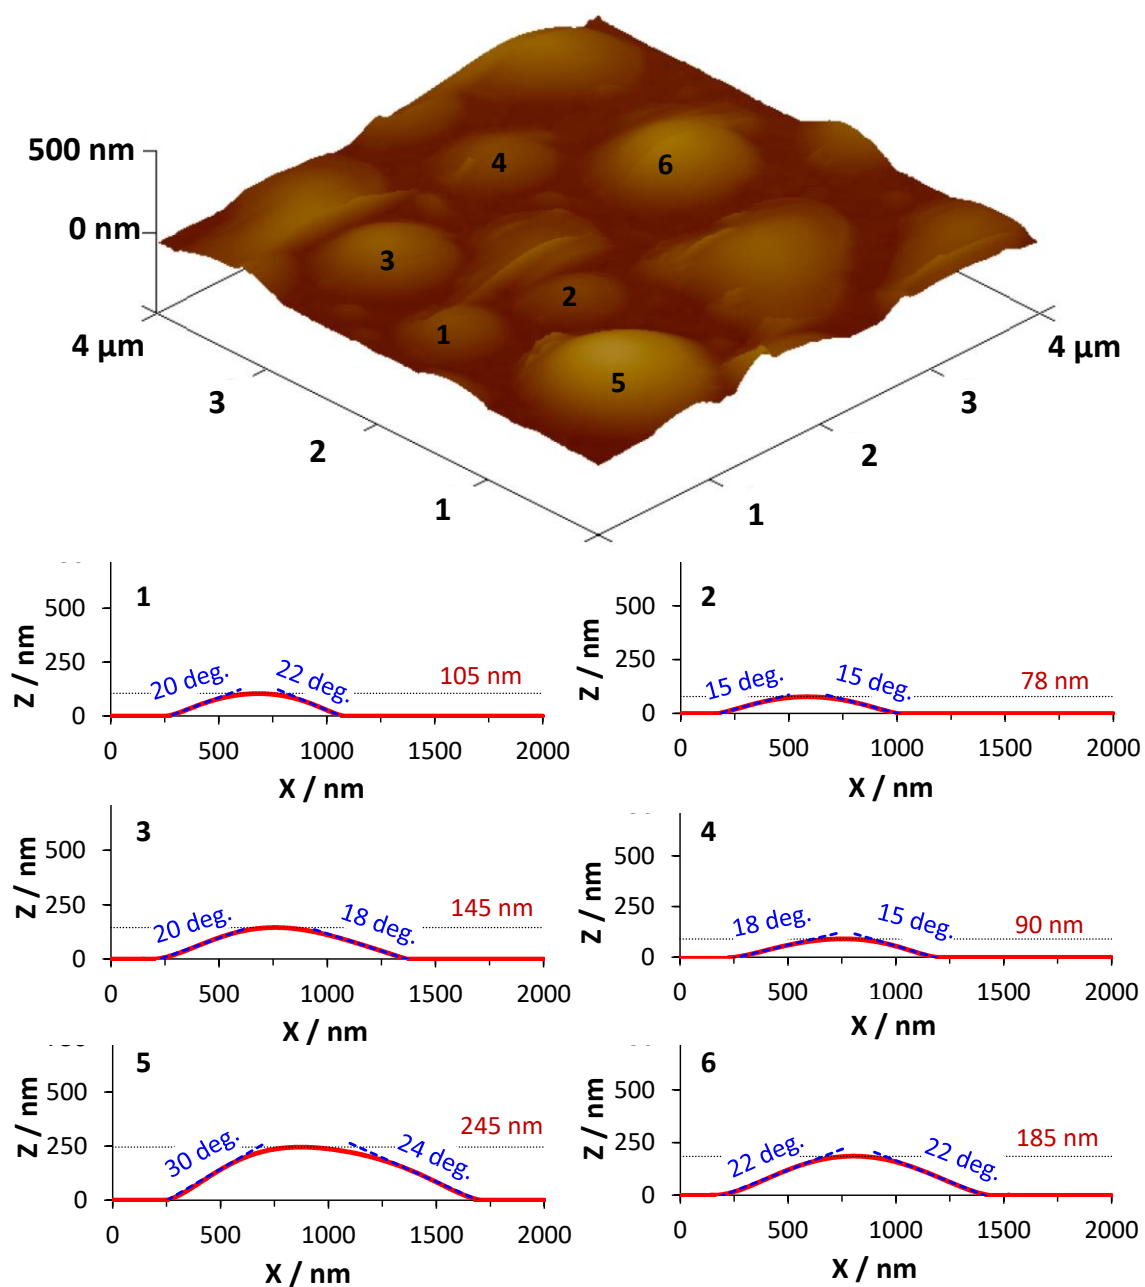

**Fig. S11.** Three-dimensional AFM image, recorded in a non-contact mode, for vapor-deposited  $[\text{C}_1\text{C}_{1\text{im}}][\text{NTf}_2]$  (50 ML) onto the indium tin oxide (ITO)/glass surface. The geometric parameters (dimensions and derived contact angles) of the droplets marked in the AFM image are depicted by graphs 1, 2, 3, 4, 5, and 6.

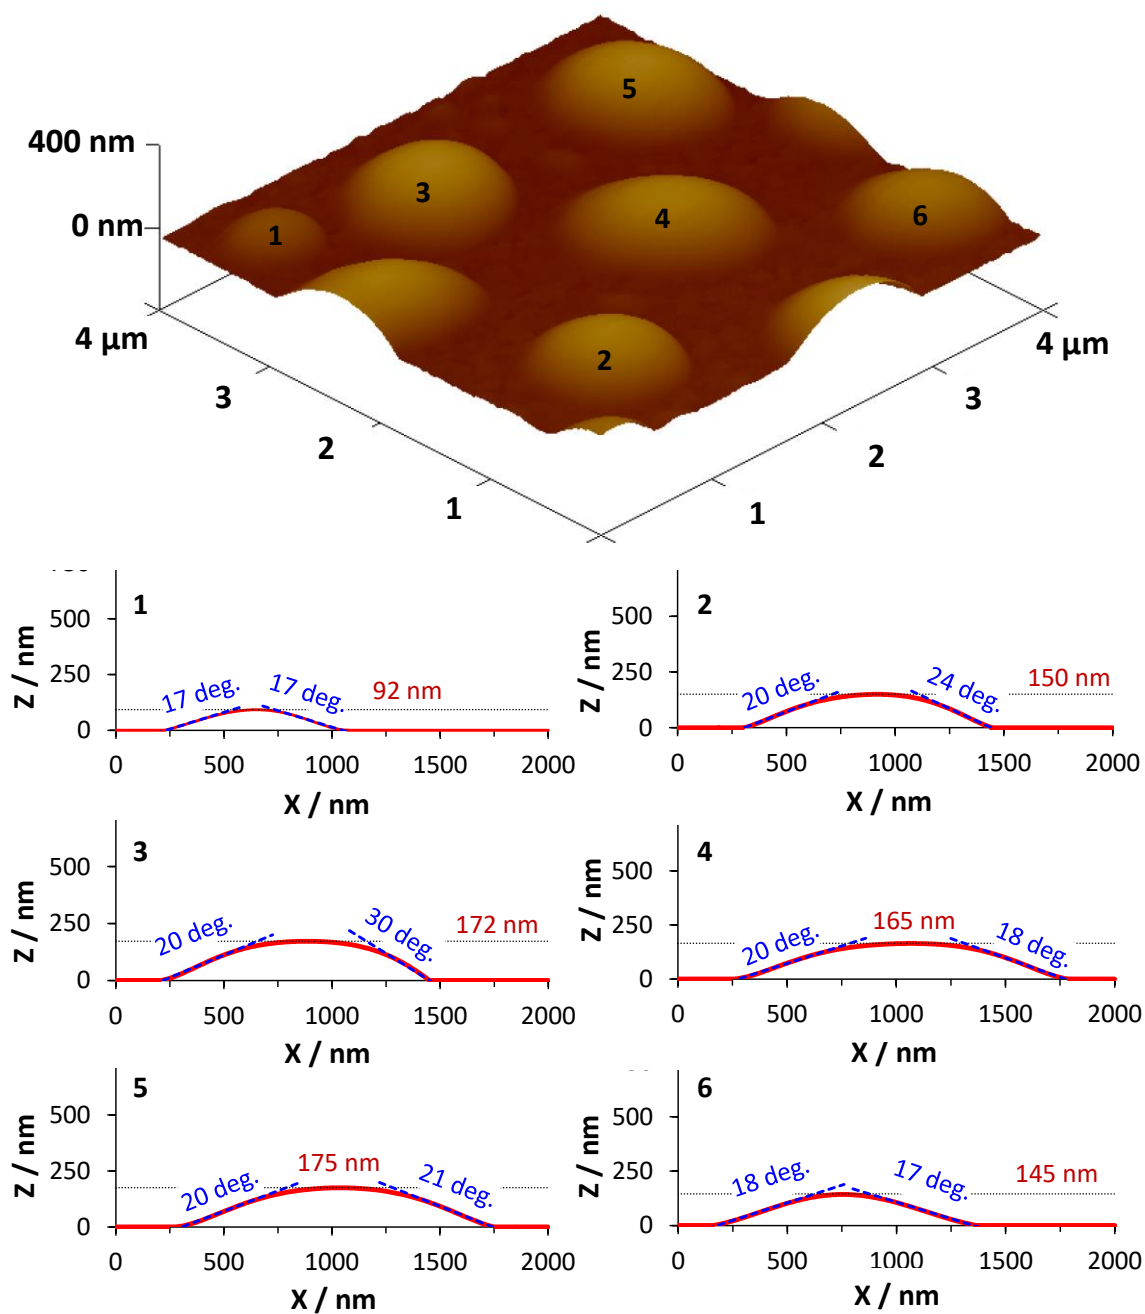

**Fig. S12.** Three-dimensional AFM image, recorded in a non-contact mode, for vapor-deposited  $[\text{C}_2\text{C}_2\text{im}][\text{NTf}_2]$  (50 ML) onto the indium tin oxide (ITO)/glass surface. The geometric parameters (dimensions and derived contact angles) of the droplets marked in the AFM image are depicted by graphs 1, 2, 3, 4, 5, and 6.

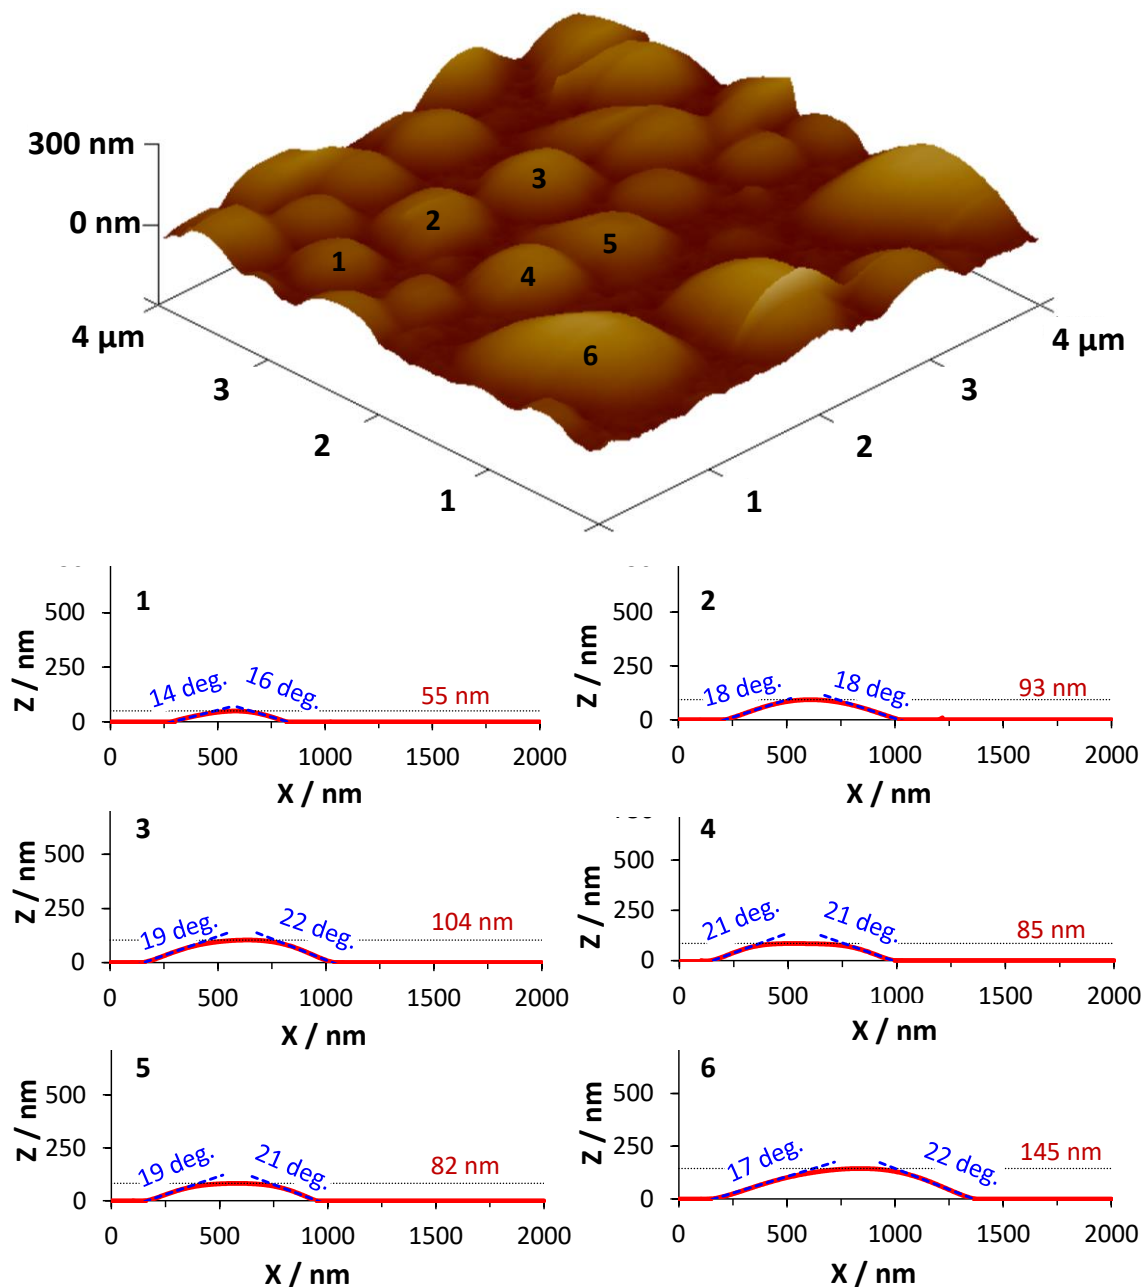

**Fig. S13.** Three-dimensional AFM image, recorded in a non-contact mode, for vapor-deposited  $[C_1C_{1im}][NTf_2]$  (50 ML) onto the silver(Ag)/ITO/glass surface. The geometric parameters (dimensions and derived contact angles) of the droplets marked in the AFM image are depicted by graphs 1, 2, 3, 4, 5, and 6.

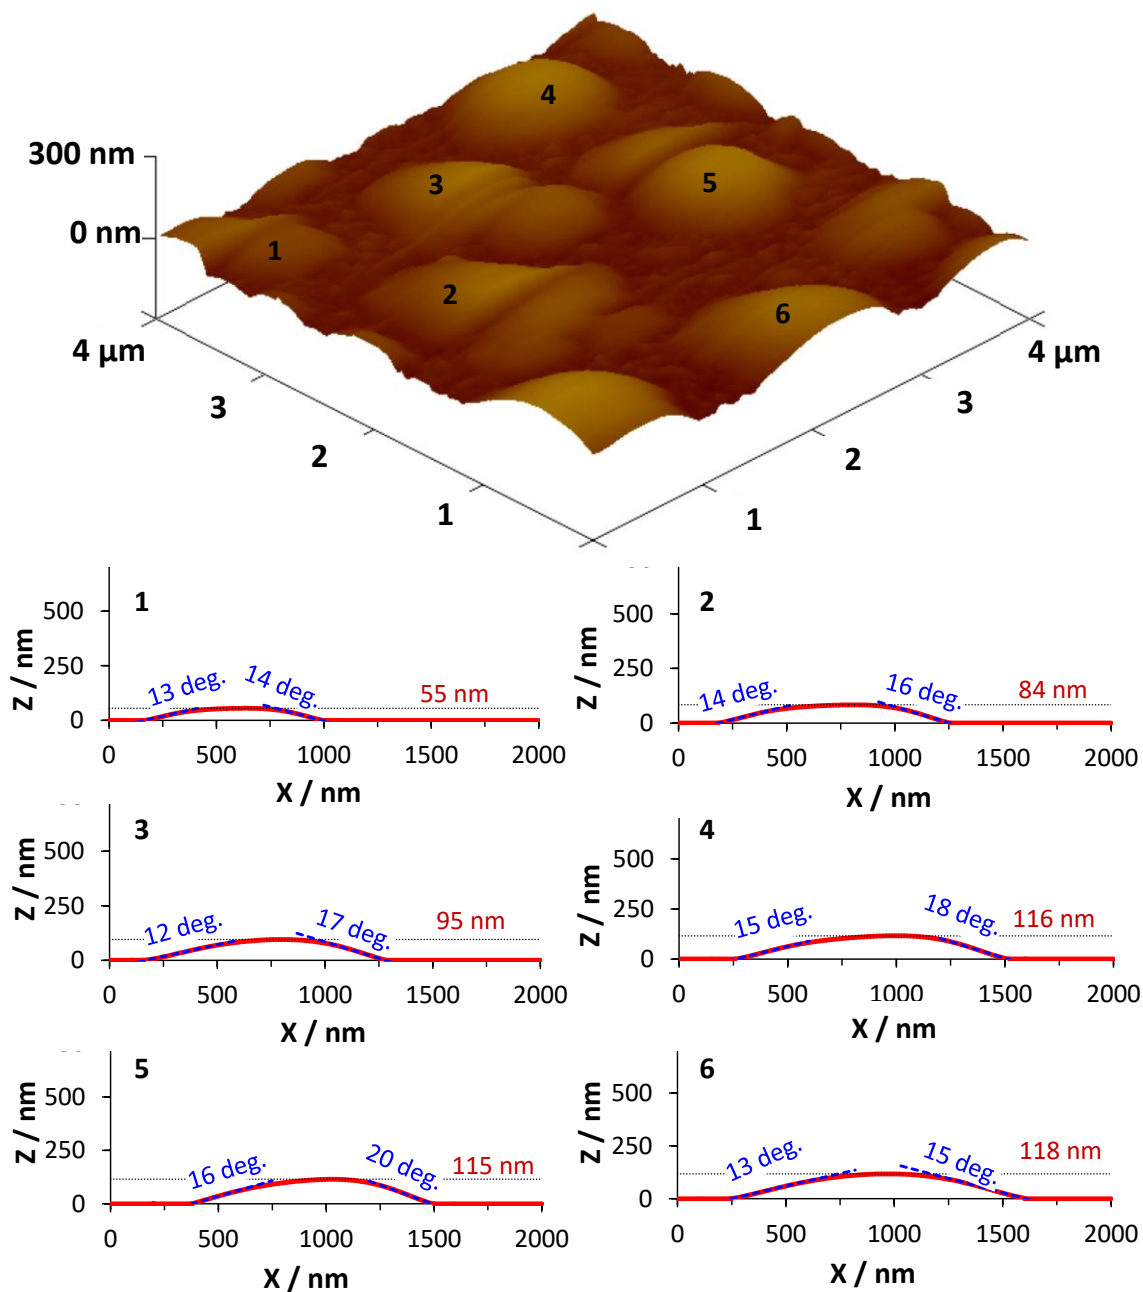

**Fig. S14.** Three-dimensional AFM image, recorded in a non-contact mode, for vapor-deposited  $[\text{C}_2\text{C}_2\text{im}][\text{NTf}_2]$  (50 ML) onto the silver(Ag)/ITO/glass surface. The geometric parameters (dimensions and derived contact angles) of the droplets marked in the AFM image are depicted by graphs 1, 2, 3, 4, 5, and 6.

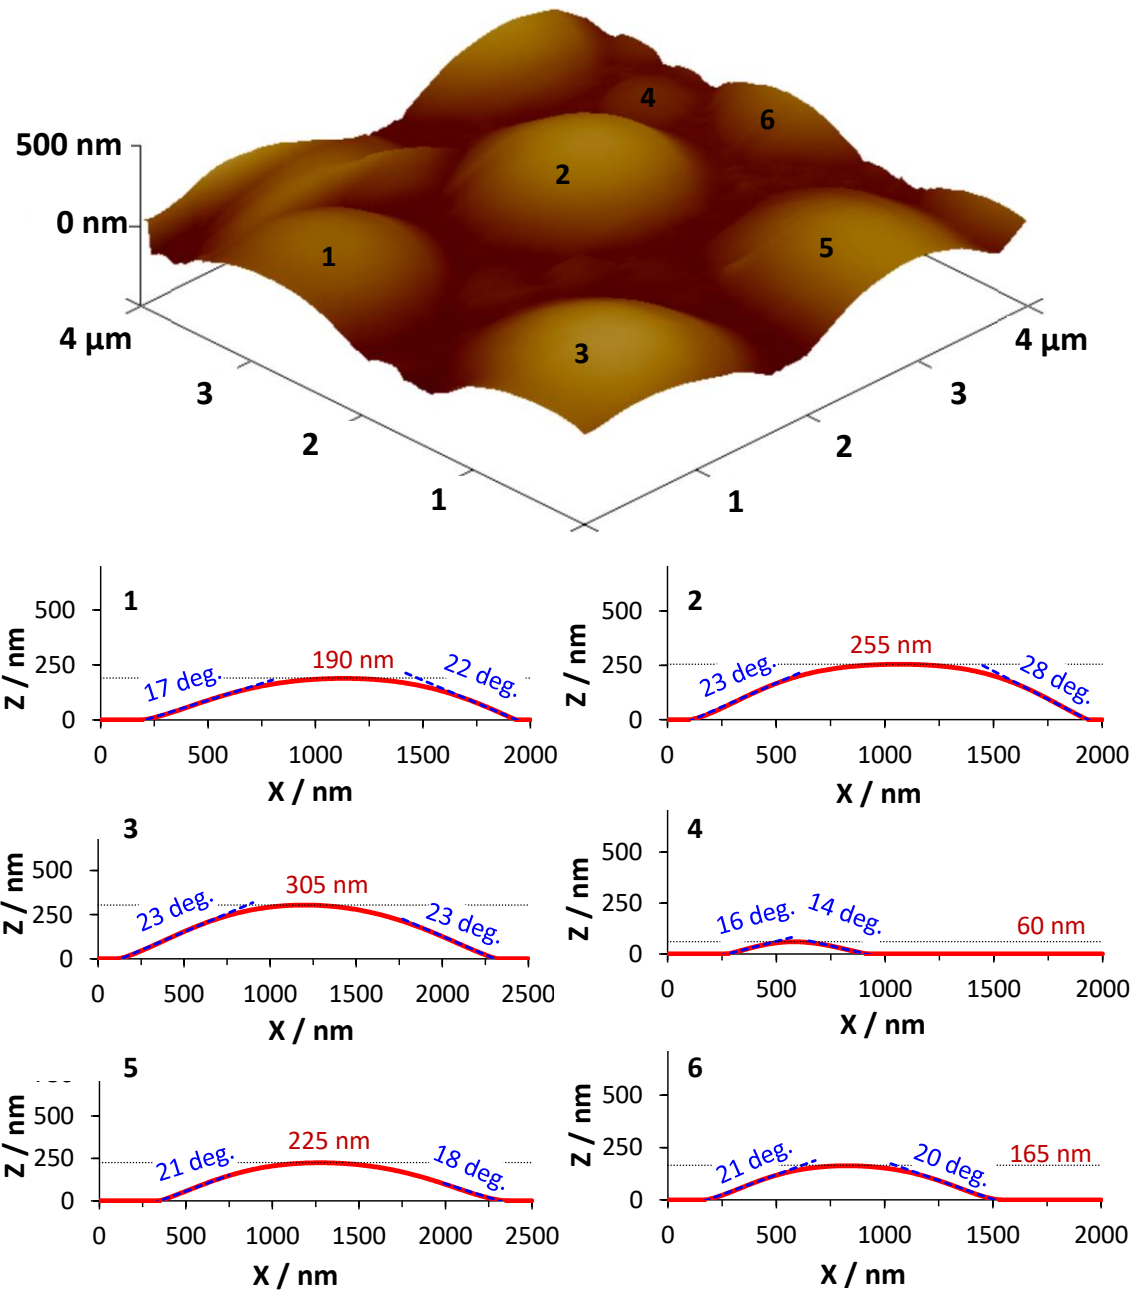

**Fig. S15.** Three-dimensional AFM image, recorded in a non-contact mode, for vapor-deposited  $[\text{C}_5\text{C}_5\text{im}][\text{NTf}_2]$  (50 ML) onto the silver(Ag)/ITO/glass surface. The geometric parameters (dimensions and derived contact angles) of the droplets marked in the AFM image are depicted by graphs 1, 2, 3, 4, 5, and 6.

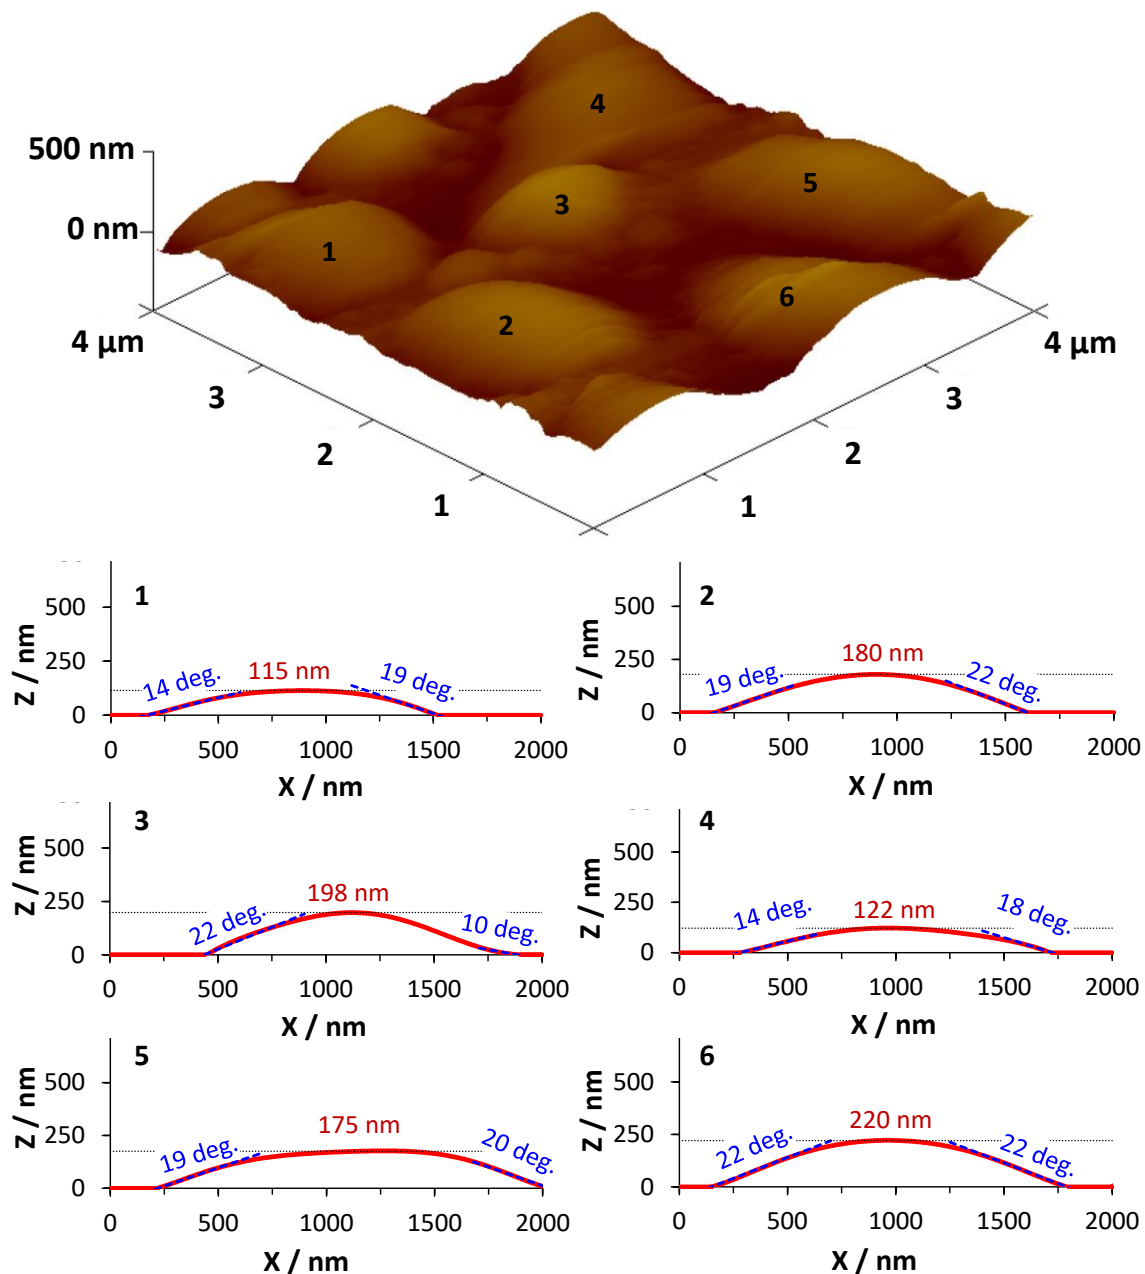

**Fig. S16.** Three-dimensional AFM image, recorded in a non-contact mode, for vapor-deposited  $[C_8C_{1im}][NTf_2]$  (50 ML) onto the silver(Ag)/ITO/glass surface. The geometric parameters (dimensions and derived contact angles) of the droplets marked in the AFM image are depicted by graphs 1, 2, 3, 4, 5, and 6.



**Table S1.** Diameter, height, and predicted contact angles ( $\theta$ ) for vapor-deposited micro- and nanodroplets of ionic liquids ( $[\text{C}_1\text{C}_1\text{im}][\text{NTf}_2]$ ,  $[\text{C}_2\text{C}_2\text{im}][\text{NTf}_2]$ ,  $[\text{C}_5\text{C}_5\text{im}][\text{NTf}_2]$ , and  $[\text{C}_8\text{C}_1\text{im}][\text{NTf}_2]$ ) onto ITO and Ag/ITO surfaces.

| Ionic liquid                                    | Substrate | Diameter / nm | Height / nm | Diameter / Height            | $\theta/\text{deg.}$         |
|-------------------------------------------------|-----------|---------------|-------------|------------------------------|------------------------------|
| $[\text{C}_1\text{C}_1\text{im}][\text{NTf}_2]$ | ITO       | 840           | 105         | 8                            | 20; 22                       |
|                                                 |           | 820           | 78          | 11                           | 15; 15                       |
|                                                 |           | 1140          | 145         | 8                            | 20; 18                       |
|                                                 |           | 930           | 90          | 10                           | 18; 15                       |
|                                                 |           | 1430          | 245         | 6                            | 30; 24                       |
|                                                 |           | 1230          | 185         | 7                            | 22; 22                       |
|                                                 |           |               |             | <b><math>8 \pm 2</math></b>  | <b><math>20 \pm 4</math></b> |
| $[\text{C}_2\text{C}_2\text{im}][\text{NTf}_2]$ | ITO       | 840           | 92          | 9                            | 17; 17                       |
|                                                 |           | 1130          | 150         | 8                            | 20; 24                       |
|                                                 |           | 1220          | 172         | 7                            | 20; 30                       |
|                                                 |           | 1520          | 165         | 9                            | 20; 18                       |
|                                                 |           | 1430          | 175         | 8                            | 20; 21                       |
|                                                 |           | 1200          | 145         | 8                            | 18; 17                       |
|                                                 |           |               |             | <b><math>8 \pm 1</math></b>  | <b><math>20 \pm 4</math></b> |
| $[\text{C}_1\text{C}_1\text{im}][\text{NTf}_2]$ | Ag/ITO    | 520           | 55          | 9                            | 14; 16                       |
|                                                 |           | 810           | 93          | 9                            | 18; 18                       |
|                                                 |           | 880           | 104         | 8                            | 19; 22                       |
|                                                 |           | 840           | 85          | 10                           | 21; 21                       |
|                                                 |           | 790           | 82          | 10                           | 19; 21                       |
|                                                 |           | 1220          | 145         | 8                            | 17; 22                       |
|                                                 |           |               |             | <b><math>9 \pm 1</math></b>  | <b><math>19 \pm 3</math></b> |
| $[\text{C}_2\text{C}_2\text{im}][\text{NTf}_2]$ | Ag/ITO    | 840           | 55          | 15                           | 13; 14                       |
|                                                 |           | 1070          | 84          | 13                           | 14; 16                       |
|                                                 |           | 1120          | 95          | 12                           | 12; 17                       |
|                                                 |           | 1260          | 116         | 11                           | 15; 18                       |
|                                                 |           | 1120          | 115         | 10                           | 16; 20                       |
|                                                 |           | 1350          | 118         | 11                           | 13; 15                       |
|                                                 |           |               |             | <b><math>12 \pm 2</math></b> | <b><math>15 \pm 2</math></b> |
| $[\text{C}_5\text{C}_5\text{im}][\text{NTf}_2]$ | Ag/ITO    | 1740          | 190         | 9                            | 17; 22                       |
|                                                 |           | 1840          | 255         | 7                            | 23; 28                       |
|                                                 |           | 2200          | 305         | 7                            | 23; 23                       |
|                                                 |           | 630           | 60          | 11                           | 16; 14                       |
|                                                 |           | 2000          | 225         | 9                            | 21; 18                       |
|                                                 |           | 1360          | 165         | 8                            | 21; 20                       |
|                                                 |           |               |             | <b><math>9 \pm 1</math></b>  | <b><math>21 \pm 4</math></b> |
| $[\text{C}_8\text{C}_1\text{im}][\text{NTf}_2]$ | Ag/ITO    | 1350          | 115         | 12                           | 14; 19                       |
|                                                 |           | 1450          | 180         | 8                            | 19; 22                       |
|                                                 |           | 1460          | 198         | 7                            | 22; 10                       |
|                                                 |           | 1440          | 122         | 12                           | 14, 18                       |
|                                                 |           | 1820          | 175         | 10                           | 19, 20                       |
|                                                 |           | 1650          | 220         | 8                            | 22; 22                       |
|                                                 |           |               |             | <b><math>9 \pm 2</math></b>  | <b><math>18 \pm 4</math></b> |

**Table S2.** Experimental conditions for the physical vapor deposition of various ionic liquids: effusion temperature ( $T_{\text{eff}}$ ); equilibrium vapor pressure ( $EVP$ ); mass flow rate at the Knudsen effusion cell orifice ( $\Phi$  (Knudsen cell)); mass flow rate at the substrate surface ( $\Phi$  (QCM)) and corresponding deposition rate in  $\text{\AA}\cdot\text{s}^{-1}$ ; geometric factor; deposition time; thin film thickness (nm and ML, ML = monolayers).

| Precursor                                                                                  | $T_{\text{eff}}$ | $EVP$  | $\Phi$<br>(Knudsen cell)                           | $\Phi$<br>(QCM)                                  | Geometric<br>factor  | Deposition<br>rate             | Deposition<br>time | Thickness |
|--------------------------------------------------------------------------------------------|------------------|--------|----------------------------------------------------|--------------------------------------------------|----------------------|--------------------------------|--------------------|-----------|
|                                                                                            | K                | Pa     | $\mu\text{g}\cdot\text{cm}^{-2}\cdot\text{s}^{-1}$ | $\text{ng}\cdot\text{cm}^{-2}\cdot\text{s}^{-1}$ |                      | $\text{\AA}\cdot\text{s}^{-1}$ | min                |           |
| <b>Ionic Liquid (50 ML) / substrate</b>   substrates: Au/ITO; Ag/ITO; ITO                  |                  |        |                                                    |                                                  |                      |                                |                    |           |
| [C <sub>1</sub> C <sub>1</sub> im][NTf <sub>2</sub> ]                                      | 488              | ≈ 0.09 | ≈ 31                                               | 9.4 ± 3.1                                        | 3 × 10 <sup>-4</sup> | 0.6 ± 0.2                      | 10                 | 50        |
| [C <sub>2</sub> C <sub>2</sub> im][NTf <sub>2</sub> ]                                      | 488              | ≈ 0.16 | ≈ 58                                               | 7.4 ± 1.5                                        | 1 × 10 <sup>-4</sup> | 0.5 ± 0.1                      | 13                 |           |
| [C <sub>5</sub> C <sub>5</sub> im][NTf <sub>2</sub> ]                                      | 488              | ≈ 0.19 | ≈ 75                                               | 7.7 ± 1.3                                        | 1 × 10 <sup>-4</sup> | 0.6 ± 0.1                      | 12                 |           |
| [C <sub>8</sub> C <sub>1</sub> im][NTf <sub>2</sub> ]                                      | 493              | ≈ 0.08 | ≈ 31                                               | 6.6 ± 2.6                                        | 2 × 10 <sup>-4</sup> | 0.5 ± 0.2                      | 14                 |           |
| <b>[C<sub>2</sub>C<sub>2</sub>im][NTf<sub>2</sub>] (200, 400, 600, 800 ML) / ITO-glass</b> |                  |        |                                                    |                                                  |                      |                                |                    |           |
| [C <sub>2</sub> C <sub>2</sub> im][NTf <sub>2</sub> ]                                      | 488              | ≈ 0.16 | ≈ 58                                               | 11.8 ± 1.5                                       | 2 × 10 <sup>-4</sup> | 0.8 ± 0.1                      | ≈ 32               | 200       |
|                                                                                            | 488              |        |                                                    | 11.8 ± 3.0                                       | 2 × 10 <sup>-4</sup> | 0.8 ± 0.2                      | ≈ 64               | 400       |
|                                                                                            | 488              |        |                                                    | 7.4 ± 1.5                                        | 1 × 10 <sup>-4</sup> | 0.5 ± 0.1                      | ≈ 154              | 600       |
|                                                                                            | 488              |        |                                                    | 8.9 ± 1.5                                        | 2 × 10 <sup>-4</sup> | 0.6 ± 0.1                      | ≈ 171              | 800       |
| <b>[C<sub>5</sub>C<sub>5</sub>im][NTf<sub>2</sub>] (200, 400, 600, 800 ML) / ITO-glass</b> |                  |        |                                                    |                                                  |                      |                                |                    |           |
| [C <sub>5</sub> C <sub>5</sub> im][NTf <sub>2</sub> ]                                      | 488              | ≈ 0.19 | ≈ 75                                               | 7.7 ± 1.3                                        | 1 × 10 <sup>-4</sup> | 0.6 ± 0.1                      | ≈ 48               | 200       |
|                                                                                            | 488              |        |                                                    | 10.3 ± 1.3                                       | 1 × 10 <sup>-4</sup> | 0.8 ± 0.1                      | ≈ 71               | 400       |
|                                                                                            | 488              |        |                                                    | 14.2 ± 3.9                                       | 2 × 10 <sup>-4</sup> | 1.1 ± 0.3                      | ≈ 78               | 600       |
|                                                                                            | 488              |        |                                                    | 10.3 ± 1.3                                       | 1 × 10 <sup>-4</sup> | 0.8 ± 0.1                      | ≈ 152              | 800       |
